# Supplementary material for: PyMS: a Python toolkit for processing of gas chromatography-mass spectrometry (GC-MS) data. Application and comparative study of selected tools
Source: PubMed Central journal article supplement (PMC3533878; doi:10.1186/1471-2105-13-115), 2012-05-30
Supplement: 1471-2105-13-115-S1.pdf [file 1471-2105-13-115-S1.pdf]

Sheet1

| Rt (mins) | Ion | Intensity | PyMS | AnalyzerPro | XCMS | AMDIS |
|-----------|-----|-----------|------|-------------|------|-------|
| 21.45     | 350 | 4661.86   | X    | √           | X    | √     |
|           | 351 | 1771.4    |      |             |      |       |
|           | 156 | 1560.53   |      |             |      |       |
|           | 352 | 980.27    |      |             |      |       |
|           | 133 | 790.71    |      |             |      |       |
| 21.61     | 128 | 64260.78  | √    | √           | √    | √     |
|           | 243 | 41408.14  |      |             |      |       |
|           | 115 | 31721.64  |      |             |      |       |
|           | 141 | 26947.05  |      |             |      |       |
|           | 100 | 19575.03  |      |             |      |       |
| 21.93     | 218 | 13448.57  | √    | √           | X    | √     |
|           | 320 | 7121.77   |      |             |      |       |
|           | 232 | 5691.06   |      |             |      |       |
|           | 133 | 2895.09   |      |             |      |       |
|           | 219 | 2680.86   |      |             |      |       |
| 22.36     | 190 | 21208.45  | √    | √           | X    | √     |
|           | 100 | 12982.09  |      |             |      |       |
|           | 75  | 7030.10   |      |             |      |       |
|           | 72  | 6541.92   |      |             |      |       |
|           | 160 | 6082.27   |      |             |      |       |
| 22.45     | 233 | 263598.81 | √    | √           | √    | √     |
|           | 245 | 160759.34 |      |             |      |       |
|           | 133 | 97438.90  |      |             |      |       |
|           | 148 | 87032.88  |      |             |      |       |
|           | 190 | 80647.48  |      |             |      |       |
| 22.7      | 232 | 10991.14  | X    | √           | X    | √     |
|           | 233 | 2352.47   |      |             |      |       |
|           | 234 | 1054.62   |      |             |      |       |
|           | 144 | 1004.97   |      |             |      |       |
|           | 75  | 586.29    |      |             |      |       |
| 22.78     | 191 | 64775.17  | √    | √           | √    | √     |
|           | 244 | 15214.69  |      |             |      |       |
|           | 192 | 11171.79  |      |             |      |       |
|           | 75  | 6422.36   |      |             |      |       |
|           | 69  | 6129.25   |      |             |      |       |
| 22.80     | 57  | 56327.90  | √    | √           | √    | √     |
|           | 71  | 38976.70  |      |             |      |       |
|           | 243 | 34677.19  |      |             |      |       |
|           | 85  | 28391.47  |      |             |      |       |
|           | 115 | 26967.10  |      |             |      |       |
| 23.04     | 188 | 11543.2   | X    | √           | X    | √     |
|           | 84  | 2661.09   |      |             |      |       |

Sheet1

|       |     |            |   |   |   |   |
|-------|-----|------------|---|---|---|---|
|       | 189 | 1594.77    |   |   |   |   |
|       | 156 | 853.75     |   |   |   |   |
|       | 56  | 705.75     |   |   |   |   |
| 23.18 | 176 | 1163459.27 | √ | √ | √ | √ |
|       | 128 | 384991.88  |   |   |   |   |
|       | 177 | 160403.23  |   |   |   |   |
|       | 61  | 140989.85  |   |   |   |   |
|       | 293 | 127564.96  |   |   |   |   |
| 23.21 | 232 | 184533.19  | √ | √ | √ | √ |
|       | 233 | 36636.88   |   |   |   |   |
|       | 234 | 15992.52   |   |   |   |   |
|       | 306 | 5280.20    |   |   |   |   |
|       | 216 | 5069.71    |   |   |   |   |
| 23.26 | 156 | 2267023.76 | √ | √ | √ | √ |
|       | 157 | 292266.81  |   |   |   |   |
|       | 258 | 274042.30  |   |   |   |   |
|       | 230 | 217081.29  |   |   |   |   |
|       | 158 | 95046.98   |   |   |   |   |
| 23.47 | 175 | 13292.76   | √ | √ | √ | √ |
|       | 130 | 4979.94    |   |   |   |   |
|       | 191 | 4035.77    |   |   |   |   |
|       | 120 | 2903.59    |   |   |   |   |
|       | 320 | 2769.25    |   |   |   |   |
| 23.55 | 174 | 9734.02    | √ | √ | √ | √ |
|       | 84  | 8529.55    |   |   |   |   |
|       | 75  | 4665.77    |   |   |   |   |
|       | 56  | 3075.05    |   |   |   |   |
|       | 158 | 2953.82    |   |   |   |   |
| 23.60 | 142 | 4519.30    | √ | √ | x | √ |
|       | 75  | 3638.78    |   |   |   |   |
|       | 140 | 3472.98    |   |   |   |   |
|       | 156 | 2186.35    |   |   |   |   |
|       | 89  | 1194.65    |   |   |   |   |
| 23.88 | 120 | 44570.32   | √ | √ | √ | √ |
|       | 146 | 19123.96   |   |   |   |   |
|       | 91  | 5884.69    |   |   |   |   |
|       | 130 | 5811.12    |   |   |   |   |
|       | 75  | 5698.08    |   |   |   |   |
| 24.00 | 75  | 5706.74    | √ | √ | x | √ |
|       | 198 | 4483.51    |   |   |   |   |
|       | 89  | 3415.38    |   |   |   |   |
|       | 156 | 2272.97    |   |   |   |   |

Sheet1

|       |     |           |   |   |   |   |
|-------|-----|-----------|---|---|---|---|
|       | 55  | 2138.46   |   |   |   |   |
| 24.30 | 218 | 10082.16  | √ | √ | X | √ |
|       | 261 | 7620.26   |   |   |   |   |
|       | 162 | 2822.54   |   |   |   |   |
|       | 219 | 2144.05   |   |   |   |   |
|       | 100 | 1994.51   |   |   |   |   |
| 24.62 | 198 | 125498.88 | √ | √ | √ | √ |
|       | 75  | 116807.89 |   |   |   |   |
|       | 304 | 65591.14  |   |   |   |   |
|       | 156 | 64402.91  |   |   |   |   |
|       | 288 | 60730.96  |   |   |   |   |
| 24.70 | 186 | 32996.21  | √ | √ | X | √ |
|       | 142 | 32560.01  |   |   |   |   |
|       | 288 | 6929.52   |   |   |   |   |
|       | 216 | 6138.08   |   |   |   |   |
|       | 187 | 5128.53   |   |   |   |   |
| 24.80 | 218 | 13287.95  | √ | √ | X | √ |
|       | 261 | 9467.17   |   |   |   |   |
|       | 219 | 2806.87   |   |   |   |   |
|       | 162 | 2805.33   |   |   |   |   |
|       | 100 | 2567.84   |   |   |   |   |
