# Supplementary material for: PyMS: a Python toolkit for processing of gas chromatography-mass spectrometry (GC-MS) data. Application and comparative study of selected tools
Source: PubMed Central journal article supplement (PMC3533878; doi:10.1186/1471-2105-13-115), 2012-05-30
Supplement: 1471-2105-13-115-S2.pdf [file 1471-2105-13-115-S2.pdf]

Sheet1

| Rt (mins) | Ion | Intensity | PyMS | AnalyzerPro | XCMS | AMDIS |
|-----------|-----|-----------|------|-------------|------|-------|
| 30.89     | 103 | 111855.79 | √    | √           | √    | √     |
|           | 307 | 109464.19 |      |             |      |       |
|           | 217 | 103437.07 |      |             |      |       |
|           | 308 | 30600.90  |      |             |      |       |
|           | 277 | 20868.96  |      |             |      |       |
| 31.10     | 307 | 79983.77  | √    | √           | √    | √     |
|           | 217 | 77564.75  |      |             |      |       |
|           | 103 | 70295.11  |      |             |      |       |
|           | 308 | 21891.68  |      |             |      |       |
|           | 218 | 15262.36  |      |             |      |       |
| 31.17     | 319 | 242223.09 | √    | √           | √    | √     |
|           | 205 | 132534.55 |      |             |      |       |
|           | 320 | 71073.81  |      |             |      |       |
|           | 160 | 70114.01  |      |             |      |       |
|           | 217 | 50839.83  |      |             |      |       |
| 31.25     | 319 | 203946.76 | √    | √           | √    | √     |
|           | 205 | 126294.73 |      |             |      |       |
|           | 217 | 66616.00  |      |             |      |       |
|           | 320 | 60912.37  |      |             |      |       |
|           | 160 | 47295.05  |      |             |      |       |
| 31.38     | 319 | 232798.69 | √    | √           | √    | √     |
|           | 205 | 127817.78 |      |             |      |       |
|           | 160 | 71103.18  |      |             |      |       |
|           | 320 | 68891.81  |      |             |      |       |
|           | 217 | 52384.84  |      |             |      |       |
| 31.44     | 319 | 36708.46  | √    | √           | √    | √     |
|           | 205 | 21273.29  |      |             |      |       |
|           | 160 | 11733.90  |      |             |      |       |
|           | 320 | 10880.66  |      |             |      |       |
|           | 217 | 7890.43   |      |             |      |       |
| 31.66     | 57  | 85103.46  | √    | √           | √    | √     |
|           | 71  | 64981.99  |      |             |      |       |
|           | 85  | 47703.31  |      |             |      |       |
|           | 55  | 18962.16  |      |             |      |       |
|           | 154 | 15662.88  |      |             |      |       |
| 31.68     | 319 | 56065.46  | √    | √           | √    | √     |
|           | 205 | 34887.73  |      |             |      |       |
|           | 320 | 16766.18  |      |             |      |       |
|           | 217 | 16612.55  |      |             |      |       |
|           | 154 | 15946.39  |      |             |      |       |
