# Supplementary material for: PyMS: a Python toolkit for processing of gas chromatography-mass spectrometry (GC-MS) data. Application and comparative study of selected tools
Source: PubMed Central journal article supplement (PMC3533878; doi:10.1186/1471-2105-13-115), 2012-05-30
Supplement: 1471-2105-13-115-S3.pdf [file 1471-2105-13-115-S3.pdf]

Sheet1

| Rt (mins) | Ion | Intensity | PyMS | AnalyzerPro | XCMS | AMDIS |
|-----------|-----|-----------|------|-------------|------|-------|
| 8.71      | 61  | 61919.35  | X    | √           | √    | √     |
|           | 104 | 52226.56  |      |             |      |       |
|           | 56  | 51717.97  |      |             |      |       |
|           | 75  | 44499.92  |      |             |      |       |
|           | 160 | 36035.31  |      |             |      |       |
| 8.73      | 104 | 704786.15 | √    | √           | √    | √     |
|           | 61  | 652518.31 |      |             |      |       |
|           | 56  | 607251.74 |      |             |      |       |
|           | 75  | 486661.62 |      |             |      |       |
|           | 160 | 476052.43 |      |             |      |       |
| 8.74      | 174 | 53796.98  | √    | √           | √    | √     |
|           | 248 | 30973.28  |      |             |      |       |
|           | 175 | 11053.26  |      |             |      |       |
|           | 290 | 9941.1    |      |             |      |       |
|           | 249 | 7989.07   |      |             |      |       |
| 8.78      | 174 | 35214.84  | √    | √           | √    | √     |
|           | 175 | 7006.43   |      |             |      |       |
|           | 155 | 6255.12   |      |             |      |       |
|           | 59  | 5760.92   |      |             |      |       |
|           | 74  | 5686.73   |      |             |      |       |
| 8.84      | 257 | 117660.37 | √    | √           | √    | √     |
|           | 258 | 27568.21  |      |             |      |       |
|           | 75  | 21511.17  |      |             |      |       |
|           | 104 | 16437.26  |      |             |      |       |
|           | 61  | 15831.09  |      |             |      |       |
| 8.86      | 243 | 130540.07 | √    | √           | √    | √     |
|           | 244 | 28242.18  |      |             |      |       |
|           | 75  | 21245.7   |      |             |      |       |
|           | 61  | 15175.56  |      |             |      |       |
|           | 245 | 13880.63  |      |             |      |       |
| 8.91      | 174 | 77874.43  | √    | X           | X    | √     |
|           | 86  | 21749.92  |      |             |      |       |
|           | 175 | 14797.24  |      |             |      |       |
|           | 156 | 14563.11  |      |             |      |       |
|           | 160 | 13941.55  |      |             |      |       |
| 8.92      | 59  | 19734.46  | √    | X           | √    | √     |
|           | 243 | 19131.54  |      |             |      |       |
|           | 154 | 16664.27  |      |             |      |       |
|           | 104 | 15807.57  |      |             |      |       |
|           | 130 | 15242.44  |      |             |      |       |
| 8.93      | 218 | 22949.66  | √    | √           | √    | √     |
|           | 75  | 15126.82  |      |             |      |       |
|           | 160 | 14138.53  |      |             |      |       |
|           | 320 | 7807.01   |      |             |      |       |
|           | 133 | 7059.04   |      |             |      |       |
| 8.98      | 158 | 72764.45  | √    | √           | √    | √     |

Sheet1

|      |     |           |   |   |   |   |
|------|-----|-----------|---|---|---|---|
|      | 68  | 67279.34  |   |   |   |   |
|      | 155 | 16581.67  |   |   |   |   |
|      | 160 | 16184.26  |   |   |   |   |
|      | 159 | 12013.33  |   |   |   |   |
| 8.99 | 255 | 158730.37 | √ | X | √ | √ |
|      | 256 | 36418.23  |   |   |   |   |
|      | 257 | 18443.18  |   |   |   |   |
|      | 104 | 16620.2   |   |   |   |   |
|      | 270 | 16411.92  |   |   |   |   |
| 9    | 233 | 126537.91 | √ | √ | √ | √ |
|      | 75  | 107703.89 |   |   |   |   |
|      | 74  | 83087.07  |   |   |   |   |
|      | 133 | 80671.47  |   |   |   |   |
|      | 245 | 73220.77  |   |   |   |   |
| 9.02 | 104 | 16621.2   | √ | √ | X | √ |
|      | 217 | 15465.32  |   |   |   |   |
|      | 103 | 14281.03  |   |   |   |   |
|      | 117 | 10349.16  |   |   |   |   |
|      | 205 | 10129.5   |   |   |   |   |
