# Supplementary material for: PyMS: a Python toolkit for processing of gas chromatography-mass spectrometry (GC-MS) data. Application and comparative study of selected tools
Source: PubMed Central journal article supplement (PMC3533878; doi:10.1186/1471-2105-13-115), 2012-05-30
Supplement: 1471-2105-13-115-S4.pdf [file 1471-2105-13-115-S4.pdf]

Sheet1

| Rt (mins) | Ion | Intensity  | PyMS | AnalyzerPro | XCMS | AMDIS |
|-----------|-----|------------|------|-------------|------|-------|
| 7.83      | 116 | 71888.43   | √    | √           | √    | √     |
|           | 132 | 68591.7    |      |             |      |       |
|           | 57  | 16969.41   |      |             |      |       |
|           | 144 | 11934.9    |      |             |      |       |
|           | 80  | 8507.89    |      |             |      |       |
| 7.85      | 205 | 1102339.37 | √    | √           | √    | √     |
|           | 117 | 636852.17  |      |             |      |       |
|           | 103 | 528148.3   |      |             |      |       |
|           | 133 | 397423.45  |      |             |      |       |
|           | 218 | 297962.75  |      |             |      |       |
| 7.88      | 158 | 4058907.25 | √    | √           | √    | √     |
|           | 159 | 600902.34  |      |             |      |       |
|           | 232 | 197144.35  |      |             |      |       |
|           | 74  | 192228.67  |      |             |      |       |
|           | 75  | 190012.83  |      |             |      |       |
| 7.89      | 299 | 3878453.65 | √    | √           | √    | √     |
|           | 300 | 970830.45  |      |             |      |       |
|           | 314 | 615285.01  |      |             |      |       |
|           | 301 | 526580.12  |      |             |      |       |
|           | 133 | 364493.21  |      |             |      |       |
| 8.01      | 158 | 531088.16  | √    | √           | √    | √     |
|           | 218 | 96658.41   |      |             |      |       |
|           | 159 | 77247.38   |      |             |      |       |
|           | 75  | 35251.57   |      |             |      |       |
|           | 74  | 33932.75   |      |             |      |       |
| 8.03      | 117 | 22160.51   | √    | √           | √    | √     |
|           | 130 | 14139.97   |      |             |      |       |
|           | 75  | 13733.86   |      |             |      |       |
|           | 219 | 9624.78    |      |             |      |       |
|           | 57  | 8559.53    |      |             |      |       |
| 8.08      | 142 | 671743.31  | √    | √           | √    | √     |
|           | 143 | 90111.19   |      |             |      |       |
|           | 75  | 28338.14   |      |             |      |       |
|           | 216 | 27851.79   |      |             |      |       |
|           | 144 | 27657.7    |      |             |      |       |
| 8.1       | 174 | 4680064.34 | √    | √           | √    | √     |
|           | 248 | 935970.4   |      |             |      |       |
|           | 175 | 889935     |      |             |      |       |
|           | 86  | 523270.65  |      |             |      |       |
|           | 133 | 399538.63  |      |             |      |       |
| 8.12      | 75  | 556350.51  | √    | √           | √    | √     |
|           | 148 | 422788.91  |      |             |      |       |
|           | 247 | 279113.05  |      |             |      |       |
|           | 149 | 231568.62  |      |             |      |       |
|           | 55  | 197423.76  |      |             |      |       |
| 8.17      | 189 | 57236.28   | √    | √           | √    | √     |

Sheet1

|  |     |          |  |  |  |  |
|--|-----|----------|--|--|--|--|
|  | 205 | 37784.72 |  |  |  |  |
|  | 292 | 37292.38 |  |  |  |  |
|  | 133 | 34525.84 |  |  |  |  |
|  | 103 | 34376.56 |  |  |  |  |
